# Supplementary material
Source: PubMed Central journal article supplement (PMC3725070)
Supplement: 1216318110_pnas.201216318SI.pdf [file 1216318110_pnas.201216318SI.pdf]

# Supporting Information

van den Berg et al. 10.1073/pnas.1216318110

## Chinese Remainder Sieve Construction

Eppstein et al. (1) recently proposed the “Chinese remainder sieve,” a number-theoretic method for the deterministic construction of  $d$ -disjunct matrices. To generate a  $d$ -disjunct matrix with at least  $n$  columns, first choose a sequence  $\{p_1^{e_1}, p_2^{e_2}, \dots, p_k^{e_k}\}$  of powers of distinct primes such that  $\prod_{i=1}^k p_i^{e_i} \geq n^d$ . A  $t \times n$  matrix  $A$  with  $t = \sum_{i=1}^k p_i^{e_i}$  is then created by vertical concatenation of  $p_i^{e_i} \times n$  matrices  $A_i$  as follows:

$$A = \begin{bmatrix} A_1 \\ A_2 \\ \vdots \\ A_k \end{bmatrix}, \quad A_i(i, j) = \begin{cases} 1 & i \equiv j \pmod{p_i^{e_i}} \\ 0 & \text{otherwise} \end{cases}.$$

As an example, consider the construction of a 1-disjunct  $5 \times 6$  matrix generated based on  $p_1 = 2$  and  $p_2 = 3$ . Applying the above definition we obtain:

$$A = \begin{bmatrix} A_1 \\ A_2 \end{bmatrix} = \begin{bmatrix} 1 & 0 & 1 & 0 & 1 & 0 \\ 0 & 1 & 0 & 1 & 0 & 1 \\ 1 & 0 & 0 & 1 & 0 & 0 \\ 0 & 1 & 0 & 0 & 1 & 0 \\ 0 & 0 & 1 & 0 & 0 & 1 \end{bmatrix}.$$

The above construction requires  $t = \mathcal{O}(d^2 \log^2 n / (\log d + \log \log n))$  rows for a  $d$ -disjunct matrix of size  $n$  (1). This is only slightly worse than the best-known  $\mathcal{O}(d^2 \log n)$  construction by Porat and Rothschild (2). Using a near-exhaustive search over prime-power combinations, we construct  $d$ -disjunct matrices with size at least 3,600. The parameters giving designs with the smallest number of rows are given in Table S1.

## Additional Simulation Results

In this section we provide some additional data obtained from the numerical simulations of scintillation events. For details on the setup, please refer to the main article. Tables S2–S4 provide the decoding statistics for time-to-digital converter intervals of 10 ps and 40 ps, respectively. Table S5 summarizes the simulation results on a  $120 \times 120$  pixel array for various parameter choices.

1. Eppstein D, Goodrich MT, Hirschberg DS (2007) Improved combinatorial group testing algorithms for real-world problem sizes. *SIAM J Comput* 36: 1360–1375.

2. Porat E, Rothschild A (2008) Explicit non-adaptive combinatorial group testing schemes. *Automata, Languages and Programming*, eds Aceto L, et al. (Springer, Berlin), Vol 5125 of *Lecture Notes Comp Sci*, pp 748–759.

**Table S1. Prime powers used for the construction of  $d$ -disjunct  $t \times n$**

| $d$ | $t$ | $n$   | Prime powers                                                         |
|-----|-----|-------|----------------------------------------------------------------------|
| 2   | 82  | 4,077 | $\{2^3, 3^2, 5, 7, 11, 13, 17, 23\}$                                 |
| 3   | 155 | 3,855 | $\{2^2, 3, 5, 7, 11, 13, 17, 19, 23, 29, 37\}$                       |
| 4   | 237 | 3,631 | $\{2^3, 3, 5, 7, 11, 13, 17, 19, 23, 29, 31, 37, 43\}$               |
| 5   | 333 | 4,023 | $\{2^3, 3^2, 5, 7, 11, 13, 17, 19, 23, 29, 31, 37, 41, 43, 53\}$     |
| 6   | 445 | 4,077 | $\{2^3, 3^2, 5, 7, 11, 13, 17, 19, 23, 29, 31, 37, 41, 43, 53, 61\}$ |

**Table S2. Decoding statistics for a  $60 \times 60$  pixel grid using the default parameters with a pixel dead time of 20 ns and a time-to-digital converter (TDC) interval length of 10 ps**

| No. simultaneous | No. of events | Decoded events, %                              |            |             |             |             |
|------------------|---------------|------------------------------------------------|------------|-------------|-------------|-------------|
|                  |               | $d=2$ (51)                                     | $d=3$ (85) | $d=4$ (142) | $d=5$ (174) | $d=6$ (206) |
| 1                | 2,215,860     | 100.000                                        | 100.000    | 100.000     | 100.000     | 100.000     |
| 2                | 358,800       | 100.000                                        | 100.000    | 100.000     | 100.000     | 100.000     |
| 3                | 57,314        | 44.199                                         | 100.000    | 100.000     | 100.000     | 100.000     |
| 4                | 8,566         | 2.603                                          | 89.412     | 100.000     | 100.000     | 100.000     |
| 5                | 1,066         | 0.000                                          | 43.621     | 99.906      | 100.000     | 100.000     |
| 6                | 147           | 0.000                                          | 10.204     | 99.320      | 100.000     | 100.000     |
| 7                | 16            | 0.000                                          | 0.000      | 100.000     | 100.000     | 100.000     |
|                  |               | Pixel firings missed: groupwise, individual, % |            |             |             |             |
|                  |               | 4.312                                          | 0.240      | 0.000       | 0.000       | 0.000       |
|                  |               | 1.128                                          | 0.010      | 0.000       | 0.000       | 0.000       |

Results shown correspond to the decoding of 1,000 sequential scintillation events.  $d$ , disjunctness; number of TDCs is given in parentheses in column headings. Total number of pixel firings, 3,145,990.

**Table S3. Decoding statistics for a 120 × 120 pixel grid using the default parameters with a pixel dead time of 20 ns and a time-to-digital converter (TDC) interval length of 10 ps**

| No. simultaneous | No. of events | Decoded events, %                              |                    |                    |                    |                    |
|------------------|---------------|------------------------------------------------|--------------------|--------------------|--------------------|--------------------|
|                  |               | <i>d</i> = 2 (63)                              | <i>d</i> = 3 (110) | <i>d</i> = 4 (161) | <i>d</i> = 5 (233) | <i>d</i> = 6 (323) |
| 1                | 2,392,049     | 100.000                                        | 100.000            | 100.000            | 100.000            | 100.000            |
| 2                | 450,460       | 100.000                                        | 100.000            | 100.000            | 100.000            | 100.000            |
| 3                | 81,201        | 16.558                                         | 100.000            | 100.000            | 100.000            | 100.000            |
| 4                | 13,109        | 0.099                                          | 95.217             | 100.000            | 100.000            | 100.000            |
| 5                | 1,760         | 0.000                                          | 64.205             | 99.830             | 100.000            | 100.000            |
| 6                | 228           | 0.000                                          | 11.842             | 96.930             | 100.000            | 100.000            |
| 7                | 25            | 0.000                                          | 0.000              | 80.000             | 100.000            | 100.000            |
| 8                | 1             | 0.000                                          | 0.000              | 0.000              | 100.000            | 100.000            |
|                  |               | Pixel firings missed: groupwise, individual, % |                    |                    |                    |                    |
|                  |               | 7.390                                          | 0.196              | 0.003              | 0.000              | 0.000              |
|                  |               | 4.341                                          | 0.003              | 0.000              | 0.000              | 0.000              |

Results shown correspond to the decoding of 1,000 sequential scintillation events. *d*, disjunctness; number of TDCs is given in parentheses in column headings. Total no. of pixel firings, 3,599,359.

**Table S4. Decoding statistics for a 120 × 120 pixel array using a pixel dead time of 20 ns and TDC interval length of 40 ps**

| No. simultaneous | No. of events | Decoded events, %                              |                    |                    |                    |                    |
|------------------|---------------|------------------------------------------------|--------------------|--------------------|--------------------|--------------------|
|                  |               | <i>d</i> = 2 (63)                              | <i>d</i> = 3 (110) | <i>d</i> = 4 (161) | <i>d</i> = 5 (233) | <i>d</i> = 6 (323) |
| 1                | 992,945       | 100.000                                        | 100.000            | 100.000            | 100.000            | 100.000            |
| 2                | 444,448       | 100.000                                        | 100.000            | 100.000            | 100.000            | 100.000            |
| 3                | 230,712       | 16.390                                         | 100.000            | 100.000            | 100.000            | 100.000            |
| 4                | 118,381       | 0.091                                          | 95.275             | 100.000            | 100.000            | 100.000            |
| 5                | 56,684        | 0.000                                          | 62.900             | 99.737             | 100.000            | 100.000            |
| 6                | 25,215        | 0.000                                          | 15.435             | 96.764             | 99.996             | 100.000            |
| 7                | 10,061        | 0.000                                          | 1.312              | 80.698             | 99.901             | 100.000            |
| 8                | 3,711         | 0.000                                          | 0.054              | 43.897             | 99.111             | 100.000            |
| 9                | 1,224         | 0.000                                          | 0.000              | 12.582             | 95.997             | 99.918             |
| 10               | 421           | 0.000                                          | 0.000              | 1.663              | 83.610             | 99.525             |
| 11               | 115           | 0.000                                          | 0.000              | 0.000              | 56.522             | 99.130             |
| 12               | 33            | 0.000                                          | 0.000              | 0.000              | 27.273             | 100.000            |
| 13               | 8             | 0.000                                          | 0.000              | 0.000              | 12.500             | 100.000            |
| 14               | 3             | 0.000                                          | 0.000              | 0.000              | 0.000              | 100.000            |
|                  |               | Pixel firings missed: groupwise, individual, % |                    |                    |                    |                    |
|                  |               | 44.554                                         | 10.326             | 1.430              | 0.068              | 0.001              |
|                  |               | 35.707                                         | 1.999              | 0.061              | 0.000              | 0.000              |

Results shown correspond to the decoding of 1,000 sequential scintillation events. *d*, disjunctness; number of TDCs is given in parentheses in column headings. Total number of pixel firings, 3,599,359.
